# Supplementary material for: Co-grafting of surfactants: a facile and effective method for the performance enhancement of plastic crystal based solid-state dye-sensitized solar cells
Source: Royal Society of Chemistry journal article supplement (doi:10.1039/c4ta01255k), 2014-01-01
Supplement: c4ta01255k1.pdf [file c4ta01255k1.pdf]

# **Electronic Supplementary Information**

## **Co-grafting of Surfactants: A Facile and Effective Method for the Performance Enhancement of Plastic Crystal Based Solid-State Dye-Sensitized Solar Cells**

Dan Xu, Chengzhen Shi, Lei Wang, Lihua Qiu and Feng Yan\*

Jiangsu Key Laboratory of Advanced Functional Polymer Design and Application, Department of  
Polymer Science and Engineering, College of Chemistry, Chemical Engineering and Materials Science,  
Soochow University, Suzhou, 215123, PR China

E-mail: [fyan@suda.edu.cn](mailto:fyan@suda.edu.cn)

**Table S1** Photovoltaic parameters for the DSSCs employing N719 alone, AOT/N719, CDCA/N719 and DTAB/N719 under simulated AM 1.5 solar spectrum illumination at 100 mW cm<sup>-2</sup> after being heated at 60 °C for 10 min (three batches of cells).

| Cell      | Treatment       | $J_{sc}$ [mA cm <sup>-2</sup> ] | $V_{oc}$ [V] | $FF$  | $PCE$ [%] |
|-----------|-----------------|---------------------------------|--------------|-------|-----------|
| N719      | initial         | 9.96                            | 0.642        | 0.715 | 4.57      |
|           | heated at 60 °C | 10.50                           | 0.646        | 0.727 | 4.93      |
|           | initial         | 9.90                            | 0.642        | 0.723 | 4.59      |
|           | heated at 60 °C | 10.50                           | 0.648        | 0.732 | 4.98      |
|           | initial         | 9.80                            | 0.640        | 0.708 | 4.44      |
|           | heated at 60 °C | 10.40                           | 0.642        | 0.722 | 4.82      |
| AOT/N719  | initial         | 10.21                           | 0.677        | 0.713 | 4.92      |
|           | heated at 60 °C | 12.50                           | 0.718        | 0.751 | 6.75      |
|           | initial         | 10.10                           | 0.683        | 0.721 | 4.97      |
|           | heated at 60 °C | 12.40                           | 0.719        | 0.767 | 6.83      |
|           | initial         | 10.30                           | 0.671        | 0.703 | 4.86      |
|           | heated at 60 °C | 12.70                           | 0.710        | 0.742 | 6.69      |
| CDCA/N719 | initial         | 10.50                           | 0.659        | 0.706 | 4.88      |
|           | heated at 60 °C | 11.60                           | 0.706        | 0.733 | 6.01      |
|           | initial         | 10.50                           | 0.653        | 0.699 | 4.79      |
|           | heated at 60 °C | 11.50                           | 0.701        | 0.733 | 5.91      |
|           | initial         | 10.60                           | 0.667        | 0.711 | 5.03      |
|           | heated at 60 °C | 11.70                           | 0.712        | 0.742 | 6.18      |
| DTAB/N719 | initial         | 9.82                            | 0.653        | 0.712 | 4.58      |
|           | heated at 60 °C | 10.41                           | 0.655        | 0.709 | 4.83      |
|           | initial         | 9.92                            | 0.656        | 0.703 | 4.57      |
|           | heated at 60 °C | 10.6                            | 0.656        | 0.704 | 4.89      |
|           | initial         | 9.79                            | 0.659        | 0.722 | 4.66      |
|           | heated at 60 °C | 10.32                           | 0.660        | 0.707 | 4.81      |

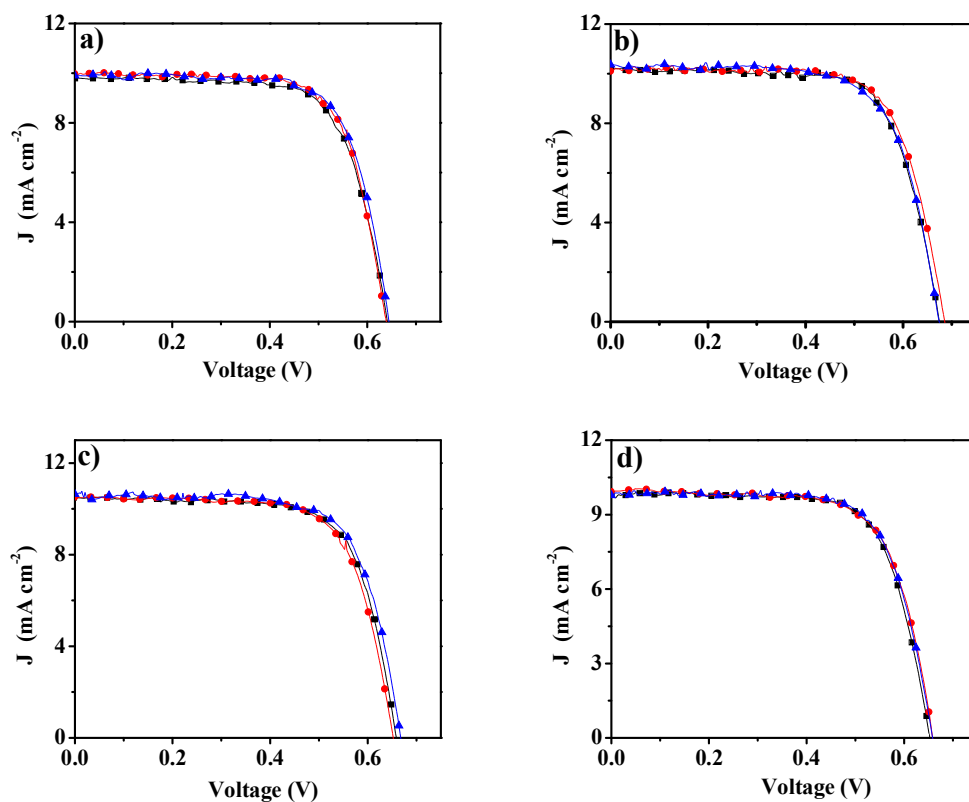

**Fig S1.**  $J$ – $V$  characteristics of the fresh cells employing  $\text{TiO}_2$  photoanodes sensitized with a) N719 alone; b) AOT/N719; c) CDCA/N719; d) DTAB/N719 under the simulated AM 1.5 solar spectrum irradiation at  $100 \text{ mW cm}^{-2}$  (three batches of cells).

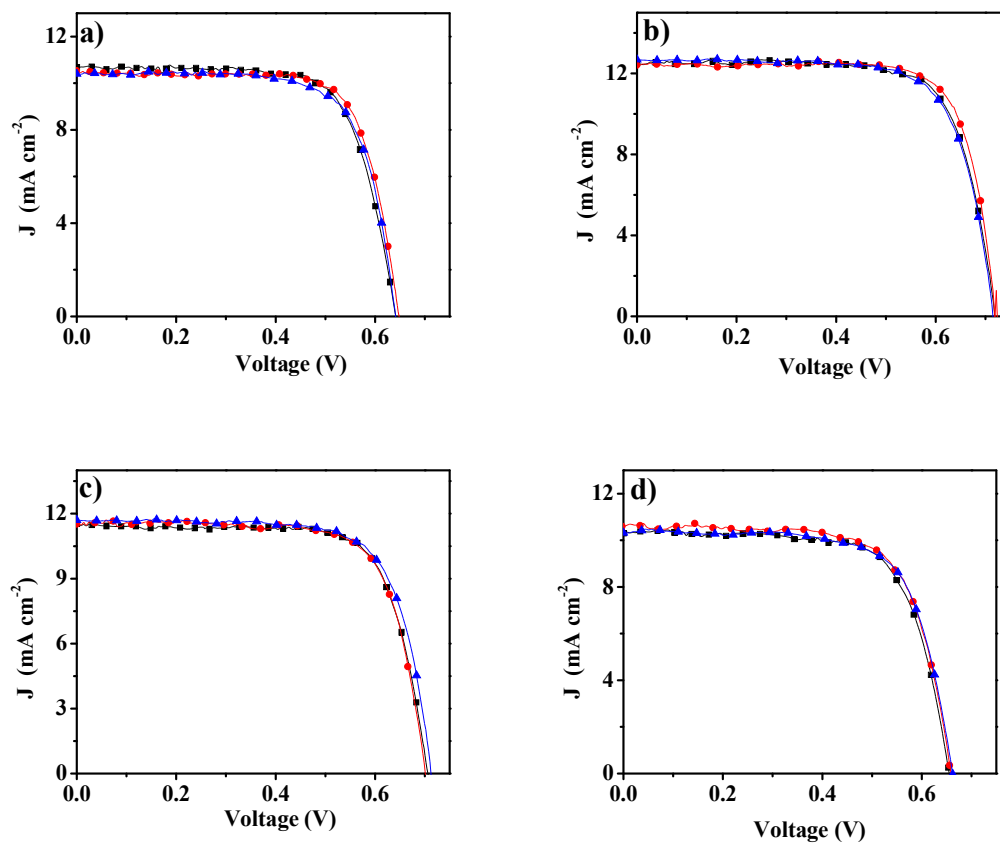

**Fig S2.**  $J$ - $V$  characteristics of the heat-treated cells (at 60 °C for 10 min) employing  $\text{TiO}_2$  photoanodes sensitized with a) N719 alone; b) AOT/N719; c) CDCA/N719; d) DTAB/N719 under the simulated AM 1.5 solar spectrum irradiation at  $100 \text{ mW cm}^{-2}$  (three batches of cells).
